# Supplementary material for: Relative dose intensity of first-line chemotherapy and overall survival in patients with advanced non-small-cell lung cancer
Source: PubMed Central journal article supplement (PMC6954126; doi:10.1007/s00520-019-04875-1), 2019-06-07
Supplement: 520_2019_4875_MOESM1_ESM.pdf [file 520_2019_4875_MOESM1_ESM.pdf]

**Supplemental Table 1. Definitions of Study Endpoints**

| <b>Study Endpoint</b>                  | <b>Definition</b>                                                                                                                                                                                    |
|----------------------------------------|------------------------------------------------------------------------------------------------------------------------------------------------------------------------------------------------------|
| RDI                                    | Ratio of delivered dose intensity to standard dose intensity using standard regimen information                                                                                                      |
| Delivered dose intensity               | Ratio of total delivered dose over the chemotherapy course ( $\text{mg}/\text{m}^2$ ) to actual time to complete chemotherapy or standard time to complete chemotherapy, whichever was longer (days) |
| Standard dose intensity                | Ratio of standard total dose ( $\text{mg}/\text{m}^2$ ) to standard time to complete chemotherapy (days)                                                                                             |
| Delivered total dose                   | Total amount of chemotherapy actually administered over chemotherapy course, based on actual administered number of chemotherapy cycles and actual administered dose in each of those cycles         |
| Actual time to chemotherapy            | Observed number of days between index date and termination date of index course                                                                                                                      |
| Standard time to complete chemotherapy | (Standard cycle length, days) $\times$ (standard number of cycles)                                                                                                                                   |
| Standard total dose                    | (Standard dose, $\text{mg}/\text{m}^2$ ) $\times$ (standard number of cycles)                                                                                                                        |
| Dose delay                             | Delay $\geq 7$ days from the standard regimen in any given cycle                                                                                                                                     |
| Dose reduction                         | Decrease in chemotherapy dose $\geq 15\%$ relative to standard ( $\text{mg}/\text{m}^2$ ) for $\geq 1$ myelosuppressive agent in any given cycle                                                     |

---

RDI=relative dose intensity.

**Supplemental Table 2. RDI, Dose Delays, and Dose Reductions by Standard Regimen**

| <b>NSCLC Chemotherapy Regimen, %</b>           | <b>Mean (SD)<br/>RDI</b> | <b>RDI &lt;85%<br/>(95% CI)</b> | <b>Dose Delay ≥7 Days<br/>(95% CI)</b> | <b>Dose Reduction ≥15%<br/>(95% CI)</b> |
|------------------------------------------------|--------------------------|---------------------------------|----------------------------------------|-----------------------------------------|
| Carboplatin + paclitaxel (n=1733)              | 75.9 (34.4)              | 53.4 (51.0–55.7)                | 39.1 (36.9–41.4)                       | 60.5 (58.2–62.8)                        |
| Pemetrexed + carboplatin (n=789)               | 95.0 (14.9)              | 23.2 (20.4–26.3)                | 22.2 (19.4–25.2)                       | 37.5 (34.2–41.0)                        |
| Bevacizumab + carboplatin + paclitaxel (n=734) | 87.1 (28.0)              | 36.8 (33.4–40.3)                | 34.3 (31.0–37.8)                       | 46.9 (43.3–50.5)                        |
| Pemetrexed + cisplatin (n=317)                 | 91.0 (12.2)              | 22.7 (18.1–27.3)                | 18.9 (15.0–23.6)                       | 25.9 (21.1–30.7)                        |
| Pemetrexed + bevacizumab + carboplatin (n=163) | 92.7 (19.1)              | 22.7 (16.9–29.7)                | 26.4 (20.2–33.6)                       | 42.9 (35.6–50.6)                        |
| Carboplatin + gemcitabine (n=130)              | 86.8 (29.8)              | 56.9 (48.3–65.1)                | 35.4 (27.7–43.9)                       | 73.1 (64.9–80.0)                        |

NSCLC=non-small-cell lung cancer; RDI=relative dose intensity.

**Supplemental Table 3. RDI, Dose Delays, and Dose Reductions Among Subgroups of Patients With NSCLC**

| <b>Patient Characteristics, % (95% CI)</b> | <b>Mean RDI</b>   | <b>RDI &lt;85%</b> | <b>Dose Delay ≥7 Days</b> | <b>Dose Reduction ≥15%</b> |
|--------------------------------------------|-------------------|--------------------|---------------------------|----------------------------|
| Age group, years                           |                   |                    |                           |                            |
| 18–49 (n=184)                              | 86.8 (82.9–90.7)  | 32.1 (25.3–38.9)   | 27.7 (21.2–34.3)          | 44.0 (36.8–51.3)           |
| 50–64 (n=1299)                             | 88.8 (87.3–90.3)  | 32.2 (29.6–34.7)   | 27.6 (25.1–30.0)          | 41.5 (38.8–44.2)           |
| 65–74 (n=1465)                             | 85.0 (83.6–86.5)  | 38.6 (36.1–41.1)   | 33.0 (30.6–35.5)          | 48.9 (46.4–51.5)           |
| ≥75 (n=918)                                | 74.8 (72.9–76.7)  | 56.5 (53.3–59.8)   | 39.3 (36.2–42.5)          | 65.3 (62.2–68.3)           |
| BSA, m <sup>2</sup>                        |                   |                    |                           |                            |
| ≤2 (n=2973)                                | 83.6 (82.6–84.6)  | 40.5 (38.8–42.3)   | 32.8 (31.1–34.5)          | 50.0 (48.2–51.8)           |
| >2 (n=892)                                 | 85.1 (83.3–86.9)  | 39.9 (36.7–43.1)   | 31.4 (28.3–34.4)          | 50.4 (47.1–53.7)           |
| ECOG PS                                    |                   |                    |                           |                            |
| 0 (n=1484)                                 | 87.8 (86.4–89.1)  | 33.6 (31.2–36.0)   | 31.4 (29.0–33.8)          | 44.7 (42.2–47.3)           |
| 1 (n=1765)                                 | 81.6 (80.2–83.0)  | 44.3 (42.0–46.6)   | 34.1 (31.8–36.3)          | 53.1 (50.8–55.4)           |
| ≥2 (n=226)                                 | 75.1 (71.4–78.8)  | 56.2 (49.7–62.7)   | 30.1 (24.1–36.1)          | 62.8 (56.5–69.2)           |
| Unknown (n=8)                              | 94.4 (69.9–118.8) | 12.5 (0–42.1)      | 50.0 (5.3–94.7)           | 12.5 (0–42.1)              |
| Missing (n=383)                            | 84.9 (82.2–87.6)  | 39.7 (34.8–44.6)   | 30.0 (25.4–34.6)          | 50.1 (45.1–55.2)           |
| Tumor subgroup                             |                   |                    |                           |                            |
| Adenocarcinoma (n=2085)                    | 86.2 (85.1–87.3)  | 36.0 (33.9–38.0)   | 30.7 (28.7–32.7)          | 46.9 (44.7–49.0)           |
| Squamous cell carcinoma (n=600)            | 78.4 (75.8–81.1)  | 52.2 (48.2–56.2)   | 40.3 (36.4–44.3)          | 59.0 (55.1–63.0)           |
| Other (n=127)                              | 83.4 (78.4–88.4)  | 38.6 (30.0–47.2)   | 36.2 (27.8–44.7)          | 56.7 (48.0–65.4)           |
| Unknown (n=425)                            | 78.4 (75.3–81.5)  | 48.9 (44.2–53.7)   | 35.8 (31.2–40.3)          | 54.8 (50.1–59.6)           |
| Missing (n=629)                            | 85.6 (83.5–87.8)  | 38.3 (34.5–42.1)   | 27.7 (24.2–31.2)          | 47.7 (43.8–51.6)           |

BSA=body surface area; ECOG PS=Eastern Cooperative Oncology Group performance status; NSCLC=non-small-cell lung cancer; RDI=relative dose intensity.

**Supplemental Table 4. Univariable and Multivariable Cox Regression Analysis for Overall Survival in NSCLC**

| Variable                               | Univariable |                     |         | Multivariable       |         |
|----------------------------------------|-------------|---------------------|---------|---------------------|---------|
|                                        | n           | HR (95% CI)         | P Value | HR (95% CI)         | P Value |
| RDI, <85% vs ≥85%                      | 3866        | 1.057 (0.979–1.142) | 0.16    | 1.176 (1.047–1.320) | 0.0062  |
| Dose delay, ≥7 vs <7 days              | 3866        | 0.776 (0.715–0.841) | <0.0001 | 0.710 (0.630–0.800) | <0.0001 |
| Dose reduction, ≥15% vs <15%           | 3866        | 1.055 (0.978–1.138) | 0.17    |                     |         |
| Age at first visit, years (continuous) | 3549        | 1.002 (0.998–1.006) | 0.27    |                     |         |
| ECOG PS                                | 3475        |                     |         |                     |         |
| 1 vs 0                                 |             | 1.364 (1.255–1.483) | <0.0001 | 1.316 (1.192–1.453) | <0.0001 |
| 2 vs 0                                 |             | 1.766 (1.498–2.081) | <0.0001 | 1.654 (1.350–2.027) | <0.0001 |
| BSA >2 vs ≤2 m <sup>2</sup>            | 3866        | 0.988 (0.903–1.080) | 0.78    |                     |         |
| Baseline ANC, <1000 vs ≥1000           | 3593        | 0.919 (0.742–1.138) | 0.44    |                     |         |
| Comorbidity, ≥1 vs 0                   | 3866        | 1.023 (0.942–1.110) | 0.59    |                     |         |
| Hemoglobin, <12 vs ≥12 g/dL            | 3663        | 1.205 (1.111–1.308) | <0.0001 | 1.098 (0.993–1.213) | 0.0686  |
| Tumor subgroup                         | 2812        |                     |         |                     |         |
| Adenocarcinoma vs squamous             |             | 0.762 (0.685–0.847) | <0.0001 | 0.783 (0.698–0.877) | <0.0001 |
| Other vs squamous                      |             | 0.929 (0.740–1.166) | 0.53    | 0.932 (0.725–1.199) | 0.5855  |

ANC=absolute neutrophil count; BSA=body surface area; ECOG PS=Eastern Cooperative Oncology Group performance status; HR=hazard ratio; NSCLC=non-small-cell lung cancer; RDI=relative dose intensity.
